# Supplementary material
Source: PubMed Central journal article supplement (PMC5952391)
Supplement: JB.00790-17_zjb999094697s1.pdf [file JB.00790-17_zjb999094697s1.pdf]

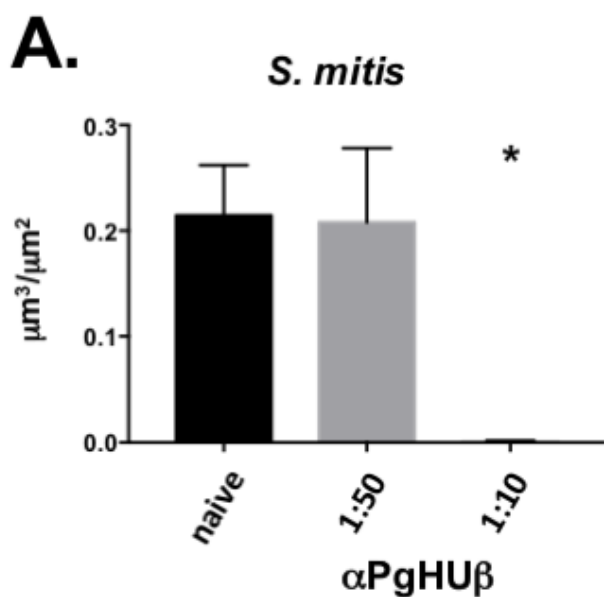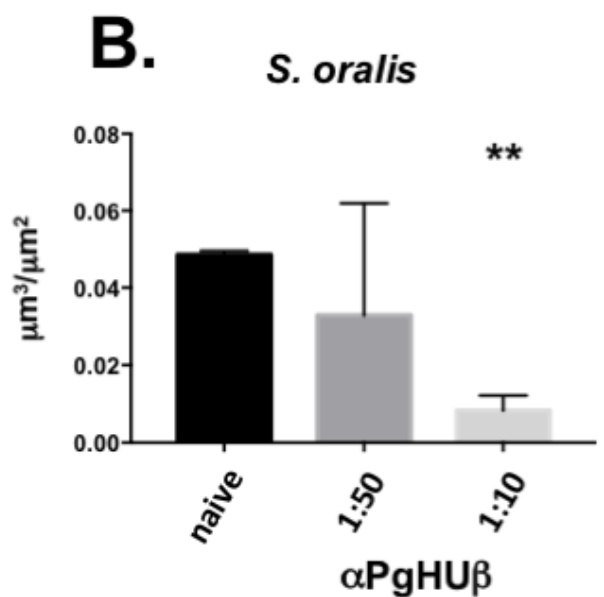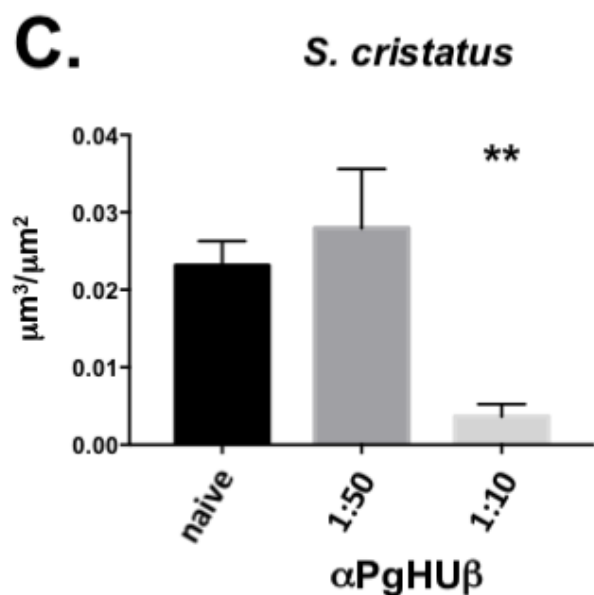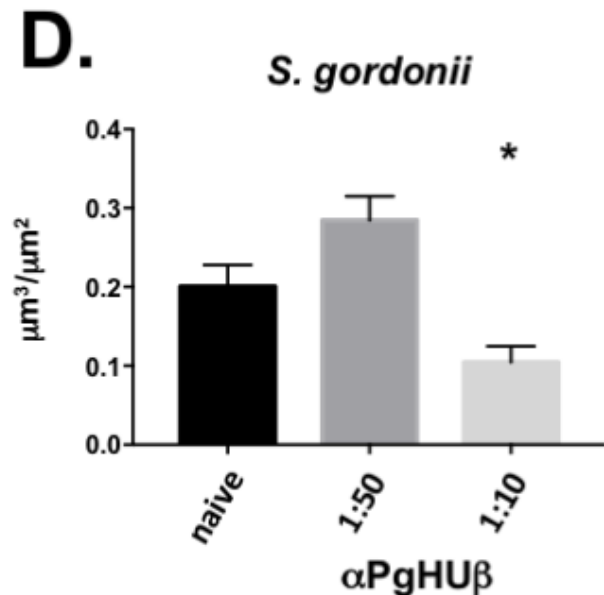

**Figure S1** – No preincubation with *P. gingivalis* reduces the ability of  $\alpha$ PgHU $\beta$  to prevent *P. gingivalis* from entering into streptococcal biofilm. Biofilms were grown for 24 h before addition of *P. gingivalis*. *P. gingivalis* and a 1:50 or 1:10 dilution of  $\alpha$ PgHU $\beta$  antisera were mixed (less than 1 min) and added to streptococcal biofilms. Graphical representations of *P. gingivalis* entering into *S. mitis* (A), *S. oralis* (B), *S. cristatus* (C), or *S. gordonii* (D) demonstrate a decrease inability to prevent *P. gingivalis* entry at a 1:50 dilution but not at a 1:10 dilution. Dual species biofilms were grown for 16 h in THBHK. Cells were stained with carboxyfluorescein succinimidyl ester (CFSE). *P. gingivalis* was immunofluorescently labeled with a polyclonal anti-fimbrial primary antisera and a secondary goat anti-rabbit Alexa-Fluor 647 conjugated antibody and visualized using confocal scanning laser microscopy. P- values are indicated by asterisks: \* -  $P \leq 0.05$ , \*\* -  $P \leq 0.01$

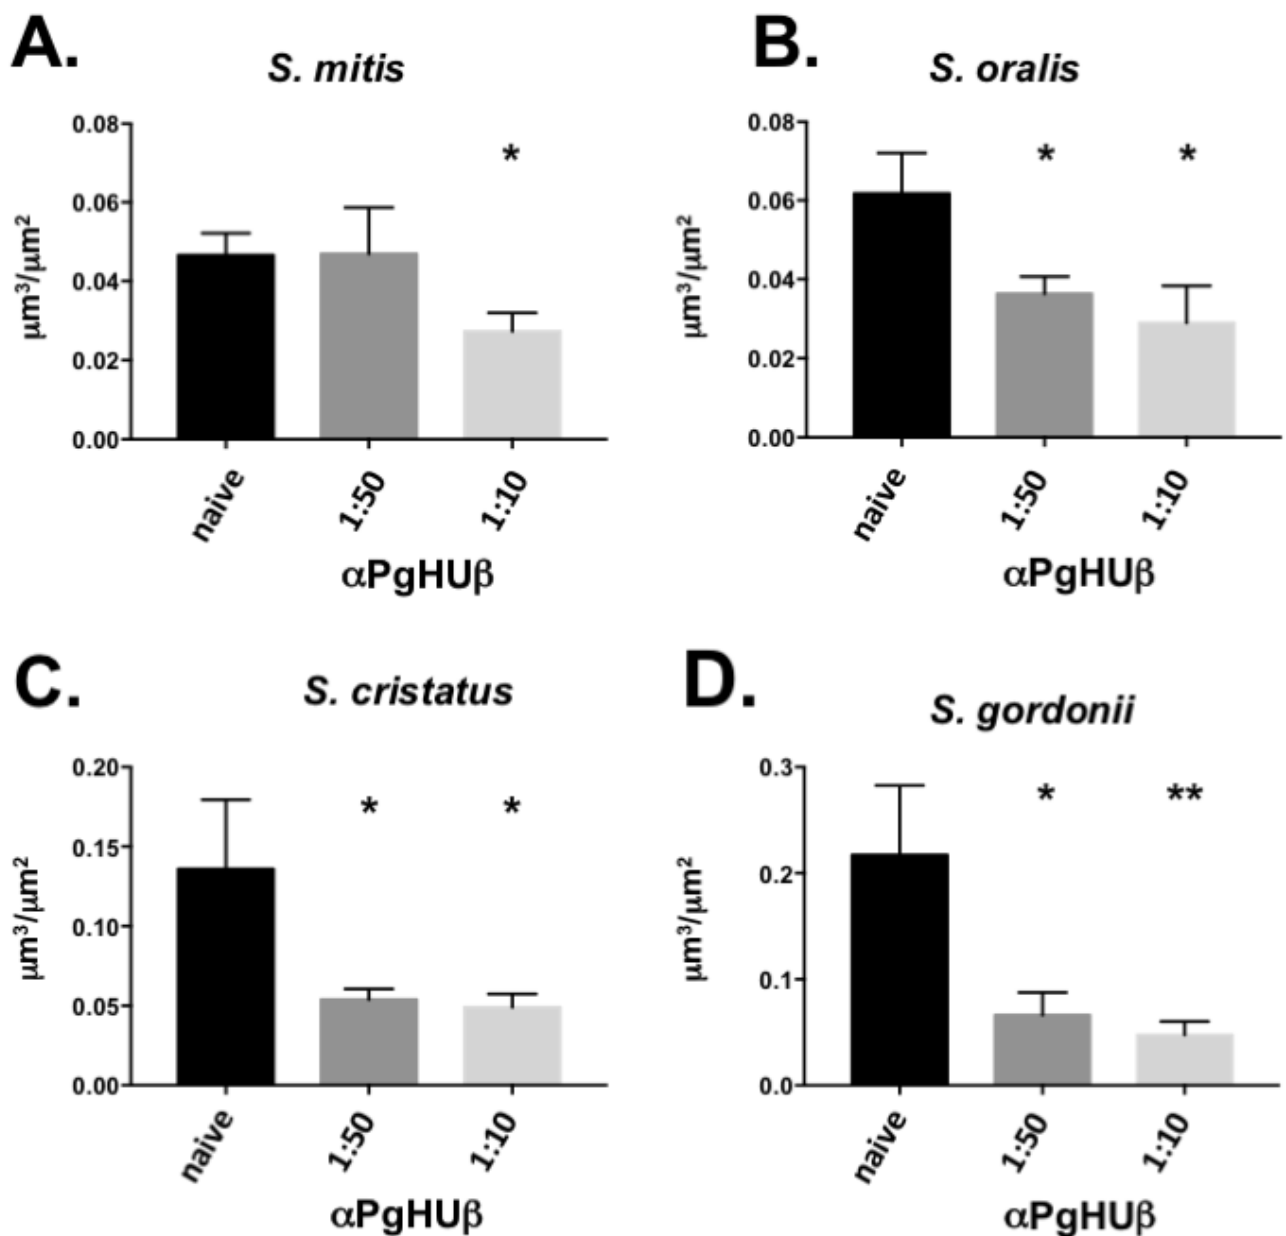

**Figure S2** – Washing *P. gingivalis* after incubation with  $\alpha\text{PgHU}\beta$  still decreases the ability of *P. gingivalis* to enter into streptococcal biofilm. Biofilms were grown for 24 h before addition of *P. gingivalis*. *P. gingivalis* and a 1:50 or 1:10 dilution of  $\alpha\text{PgHU}\beta$  antisera were pre-incubated for one hour, washed with PBS and resuspended in THBHK before addition to streptococcal biofilms. Graphical representations of *P. gingivalis* entering into *S. mitis* (A), *S. oralis* (B), *S. cristatus* (C), or *S. gordonii* (D) demonstrate a decreased ability to prevent *P. gingivalis* entry at a 1:50 dilution but not at a 1:10 dilution. Dual species biofilms were grown for 16 h in THBHK. Cells were stained with carboxyfluorescein succinimidyl ester (CFSE). *P. gingivalis* was immunofluorescently labeled with a polyclonal anti-fimbrial primary antisera and a secondary goat anti-rabbit Alexa-Fluor 647 conjugated antibody and visualized using confocal scanning laser microscopy. P-values are indicated by asterisks: \* -  $P \leq 0.05$ , \*\* -  $P \leq 0.01$ .
